# Supplementary material for: Theoretical prediction of efficient Cu-based dual-atom alloy catalysts for electrocatalytic nitrate reduction to ammonia via high-throughput first-principles calculations
Source: Royal Society of Chemistry journal article supplement (doi:10.1039/d4ta07470j), 2024-11-15
Supplement: d4ta07470j1.pdf [file d4ta07470j1.pdf]

Supporting Information for  
**Theoretical prediction of efficient Cu-based dual-atom alloy catalysts for  
electrocatalytic nitrate reduction to ammonia via high-throughput first-principles  
calculations**

Yuanyuan Wang<sup>a</sup>, Chunmei Tang<sup>a,b\*</sup>, Qianlin Li<sup>a</sup>, Ting Xiao<sup>a</sup>, Fujian Xiong<sup>a</sup>

<sup>a</sup> College of Mechanics and Engineering Science, Hohai University, Nanjing 210098,

PR China

<sup>b</sup> National Laboratory of Solid State Microstructures, Nanjing University,

Nanjing 210093, PR China

---

\*Corresponding author. E-mail: [tcmnj@163.com](mailto:tcmnj@163.com) (C. Tang)

**Table S1.** The zero-point energy corrections ( $\Delta E_{\text{ZPE}}$ ) and entropic contributions ( $T\Delta S$ ) (at 298.15

K) to the free energies of the key intermediates

| Species                          | $E_{\text{ZPE}}$ (eV) | $TS$ (eV) |
|----------------------------------|-----------------------|-----------|
| *NO <sub>3</sub>                 | 0.40                  | 0.27      |
| *NO <sub>3</sub> H               | 0.62                  | 0.27      |
| *NO <sub>2</sub>                 | 0.27                  | 0.18      |
| *NO <sub>2</sub> H               | 0.54                  | 0.18      |
| *OH+*NO <sub>2</sub>             | 0.62                  | 0.27      |
| 2*OH+*NO                         | 0.92                  | 0.25      |
| *OH+*NO                          | 0.53                  | 0.20      |
| *OH+*NOH                         | 0.82                  | 0.23      |
| *NO-end                          | 0.18                  | 0.13      |
| *NO-side                         | 0.17                  | 0.11      |
| *NOH                             | 0.45                  | 0.17      |
| *HNO                             | 0.48                  | 0.12      |
| *N                               | 0.08                  | 0.03      |
| *NH                              | 0.38                  | 0.04      |
| *NH <sub>2</sub>                 | 0.68                  | 0.09      |
| *NH <sub>3</sub>                 | 1.00                  | 0.14      |
| *HNOH                            | 0.77                  | 0.18      |
| *OH+*NH                          | 0.72                  | 0.16      |
| *OH+*NH <sub>2</sub>             | 1.06                  | 0.15      |
| *OH+*NH <sub>3</sub>             | 1.37                  | 0.22      |
| *OH                              | 0.34                  | 0.08      |
| 2*OH                             | 0.69                  | 0.19      |
| *N <sub>2</sub> O <sub>2</sub>   | 0.36                  | 0.23      |
| *N <sub>2</sub> O <sub>2</sub> H | 0.70                  | 0.23      |
| *N <sub>2</sub> O                | 0.26                  | 0.21      |
| *N <sub>2</sub> OH               | 0.56                  | 0.18      |
| *N <sub>2</sub>                  | 0.17                  | 0.22      |

**Table S2.** The zero-point energy corrections ( $\Delta E_{\text{ZPE}}$ ) and entropic contributions ( $T\Delta S$ ) (at 298.15 K) to the free energies of the relevant molecules.

| Species                   | $E_{\text{ZPE}}$ (eV) | $TS$ (eV) |
|---------------------------|-----------------------|-----------|
| HNO <sub>3</sub> (g)      | 0.70                  | 0.83      |
| HNO <sub>2</sub> trans(g) | 0.53                  | 0.77      |
| NO <sub>2</sub> (g)       | 0.23                  | 0.74      |
| NO(g)                     | 0.12                  | 0.65      |
| NH <sub>3</sub> (g)       | 0.89                  | 0.60      |
| H <sub>2</sub> (g)        | 0.27                  | 0.40      |
| H <sub>2</sub> O(g)       | 0.56                  | 0.67      |
| N <sub>2</sub> (g)        | 0.15                  | 0.58      |
| N <sub>2</sub> O(g)       | 0.29                  | 0.68      |



**Table S4.** The key parameters of  $\text{NO}_3^-$  adsorption on the  $\text{TM}_2\text{Cu}$  systems: distance between the O atoms in  $^*\text{NO}_3$  and its bonded TM atoms,  $d(\text{M}-\text{O}^*)$ ; adsorption free energy of  $\text{NO}_3^-$ ,  $\Delta G(^*\text{NO}_3)$ ; net charge of the  $^*\text{NO}_3$ ,  $\Delta Q(^*\text{NO}_3)$ ; net charge of TM dimer with adsorption of  $\text{NO}_3^-$ ,  $\Delta Q(\text{TM}-^*\text{NO}_3)$ .

| $\text{TM}_2\text{Cu}$ | $d(\text{M}-\text{O}^*)$ (Å) | $\Delta G(^*\text{NO}_3)$ (eV) | $\Delta Q(^*\text{NO}_3)$ (e) | $\Delta Q(\text{TM}-^*\text{NO}_3)$ (e) |
|------------------------|------------------------------|--------------------------------|-------------------------------|-----------------------------------------|
| $\text{V}_2\text{Cu}$  | 1.96, 1.96                   | -1.51                          | 0.87                          | -0.54                                   |
| $\text{Mn}_2\text{Cu}$ | 2.00, 1.99                   | -0.89                          | 0.79                          | -0.44                                   |
| $\text{Fe}_2\text{Cu}$ | 1.96, 1.96                   | -0.89                          | 0.77                          | -0.50                                   |
| $\text{Co}_2\text{Cu}$ | 1.96, 1.96                   | -0.64                          | 0.74                          | -0.48                                   |
| $\text{Nb}_2\text{Cu}$ | 2.07, 2.07                   | -1.07                          | 0.70                          | -0.54                                   |
| $\text{Mo}_2\text{Cu}$ | 2.08, 2.08                   | -1.60                          | 0.87                          | -0.72                                   |
| $\text{Ru}_2\text{Cu}$ | 2.10, 2.10                   | -0.64                          | 0.67                          | -0.38                                   |
| $\text{Ta}_2\text{Cu}$ | 2.04, 2.04                   | -2.06                          | 1.14                          | -0.88                                   |
| $\text{W}_2\text{Cu}$  | 2.01, 2.01                   | -2.21                          | 1.05                          | -0.96                                   |
| $\text{Re}_2\text{Cu}$ | 2.05, 2.05                   | -1.40                          | 0.85                          | -0.82                                   |
| $\text{Os}_2\text{Cu}$ | 2.11, 2.11                   | -0.60                          | 0.69                          | -0.66                                   |
| $\text{Cu}_{111}$      | 2.03, 2.03                   | 0.02                           | 0.70                          | -0.10                                   |

**Table S5.** The key parameters of H atoms adsorption on the TM<sub>2</sub>Cu systems: distance between the H atoms and TM dimers or Cu atoms,  $\Delta d(\text{TM}/\text{Cu}-\text{H}^*)$ ; adsorption free energy of H atoms,  $\Delta G(^*\text{H})$ ; net charge of the  $^*\text{H}$ ,  $\Delta Q(^*\text{H})$ ; net charge of TM dimer with adsorption of H,  $\Delta Q(\text{TM}-^*\text{H})$ .

| TM <sub>2</sub> Cu | $\Delta d(\text{TM}/\text{Cu}-^*\text{H})$ (Å) | $\Delta G(^*\text{H})$ (eV) | $\Delta Q(^*\text{H})$ (e) | $\Delta Q(\text{TM}-^*\text{H})$ (e) |
|--------------------|------------------------------------------------|-----------------------------|----------------------------|--------------------------------------|
| V <sub>2</sub> Cu  | 1.85, 1.86, 1.81                               | -0.43                       | 0.53                       | -0.45                                |
| Mn <sub>2</sub> Cu | 1.81, 1.81, 1.77                               | -0.38                       | 0.49                       | -0.28                                |
| Fe <sub>2</sub> Cu | 1.73, 1.73, 1.82                               | -0.44                       | 0.41                       | -0.26                                |
| Co <sub>2</sub> Cu | 1.69, 1.68, 1.83                               | -0.47                       | 0.33                       | -0.19                                |
| Nb <sub>2</sub> Cu | 1.90, 1.90, --                                 | -0.59                       | 0.44                       | -0.46                                |
| Mo <sub>2</sub> Cu | 1.92, 1.92, --                                 | -0.12                       | 0.46                       | -0.19                                |
| Ru <sub>2</sub> Cu | 1.82, 1.82, 1.90                               | -0.34                       | 0.28                       | -0.18                                |
| Ta <sub>2</sub> Cu | 1.90, 1.90, --                                 | -0.87                       | 0.82                       | -0.80                                |
| W <sub>2</sub> Cu  | 1.86, 1.86, --                                 | -0.58                       | 0.56                       | -0.59                                |
| Re <sub>2</sub> Cu | 1.90, 1.90, --                                 | -0.40                       | 0.37                       | -0.33                                |
| Os <sub>2</sub> Cu | 1.82, 1.82, --                                 | -0.34                       | 0.24                       | -0.22                                |
| Cu111              | 1.73, 1.73, 1.74                               | -0.18                       | 0.27                       | -0.08                                |

**Table S6.** The calculated values of  $U_L$  and corresponding potential-determining step (PDS) for eNO<sub>3</sub>RR on TM<sub>2</sub>Cu systems.

| TM <sub>2</sub> Cu | $U_L$ (V) | Limiting step                           |
|--------------------|-----------|-----------------------------------------|
| V <sub>2</sub> Cu  | -0.73     | *OH+*NH <sub>3</sub> → *NH <sub>3</sub> |
| Mn <sub>2</sub> Cu | -0.18     | *NO → *NOH                              |
| Fe <sub>2</sub> Cu | -0.30     | *NO → *NOH                              |
| Co <sub>2</sub> Cu | -0.28     | *NO → *NOH                              |
| Nb <sub>2</sub> Cu | -0.80     | *OH+*NH <sub>3</sub> → *NH <sub>3</sub> |
| Mo <sub>2</sub> Cu | -0.76     | *OH+*NH <sub>3</sub> → *NH <sub>3</sub> |
| Ru <sub>2</sub> Cu | -0.46     | *NO → *NOH                              |
| Ta <sub>2</sub> Cu | -1.48     | *OH+*NH <sub>3</sub> → *NH <sub>3</sub> |
| W <sub>2</sub> Cu  | -1.30     | *OH+*NH <sub>3</sub> → *NH <sub>3</sub> |
| Re <sub>2</sub> Cu | -0.78     | *OH+*NH <sub>3</sub> → *NH <sub>3</sub> |
| Os <sub>2</sub> Cu | -0.57     | *NO → *NOH                              |
| Cu(111)            | -0.38     | *NO <sub>2</sub> → *NO <sub>2</sub> H   |

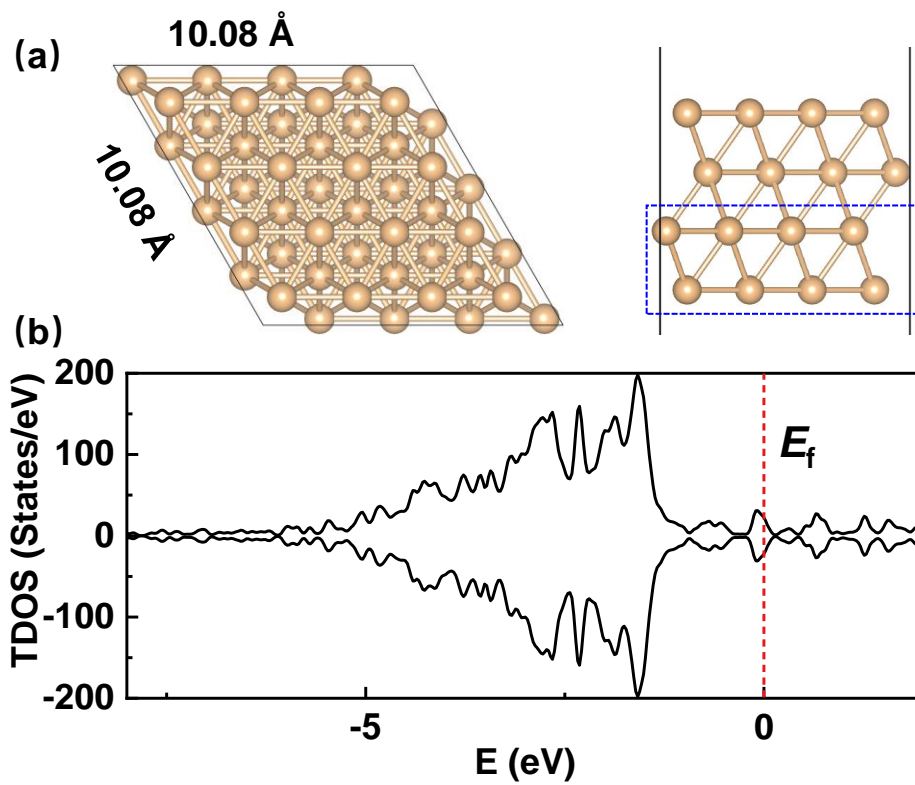

**Fig. S1.** (a) The atom configurations of  $4 \times 4 \times 4$  supercell of the pristine Cu(111) slab, with the bottom two layers were fixed. (b) The total densities of states (TDOS) of the pristine Cu(111) slab.



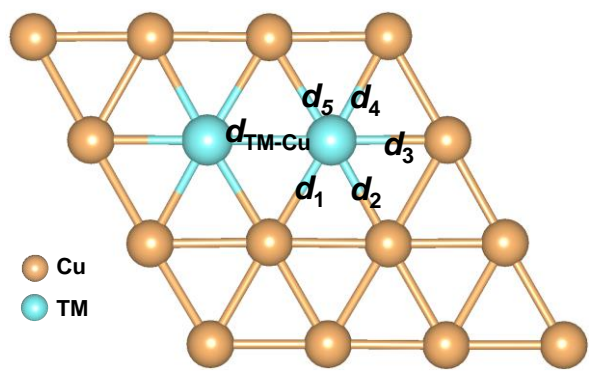

**Fig. S2.** The sites of TM bonding with Cu atoms, and  $d_1$ ,  $d_2$ ,  $d_3$ ,  $d_4$  and  $d_5$  corresponding to the values of  $d_{\text{TM-Cu}}$  in Table S3, respectively.

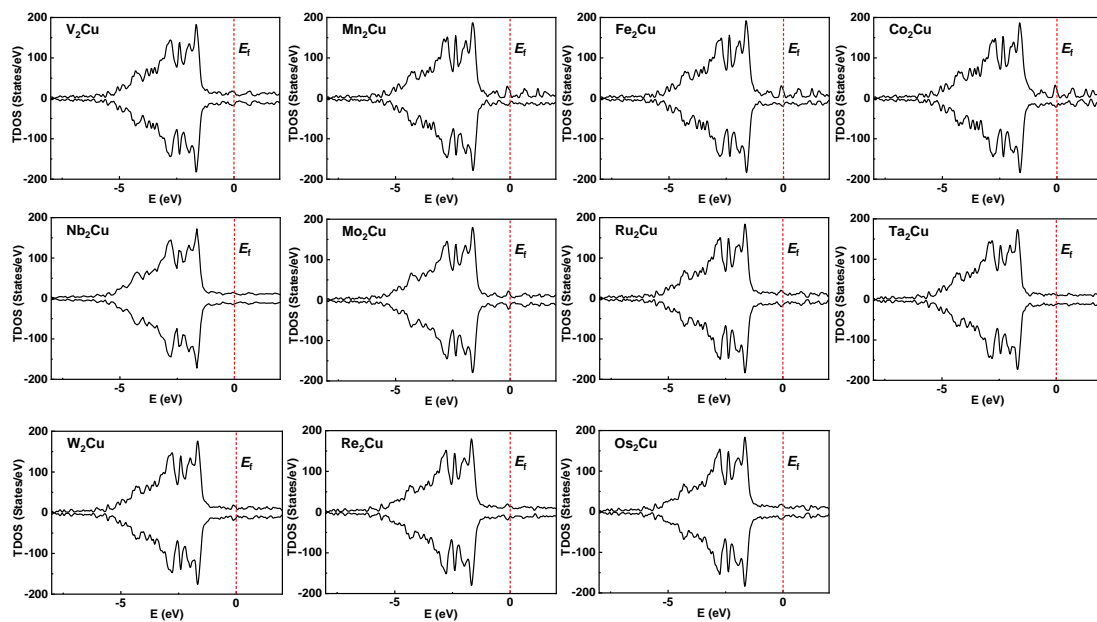

**Fig. S3.** The total densities of states (TDOS) of the screened  $\text{TM}_2\text{Cu}$  systems.

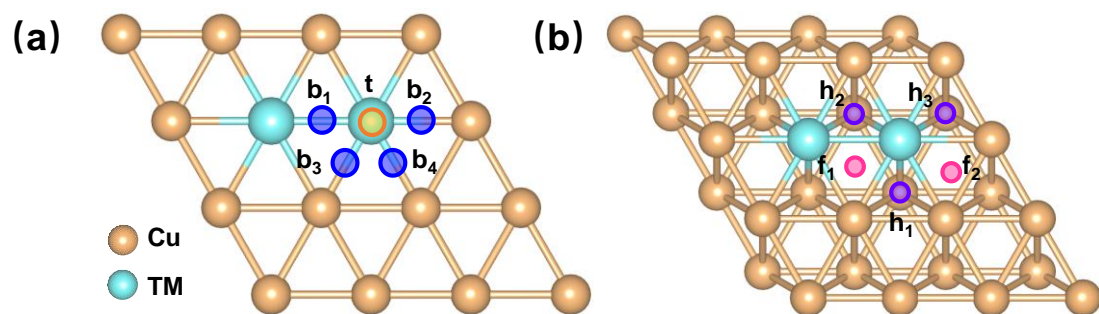

**Fig. S4.** (a) The considered adsorption sites of  $\text{NO}_3^-$  adsorbed on screened  $\text{TM}_2\text{Cu}$  catalysts,  $b_1$ ,  $b_2$ ,  $b_3$ ,  $b_4$ , and  $t$  represent different bridge site and top site respectively. (b) The considered adsorption sites of H atom adsorbed on screened  $\text{TM}_2\text{Cu}$  catalysts,  $f_1$ ,  $f_2$  and  $f_3$  represent different fcc site, respectively,  $h_1$ ,  $h_2$  and  $h_3$  represent different hollow site, respectively.

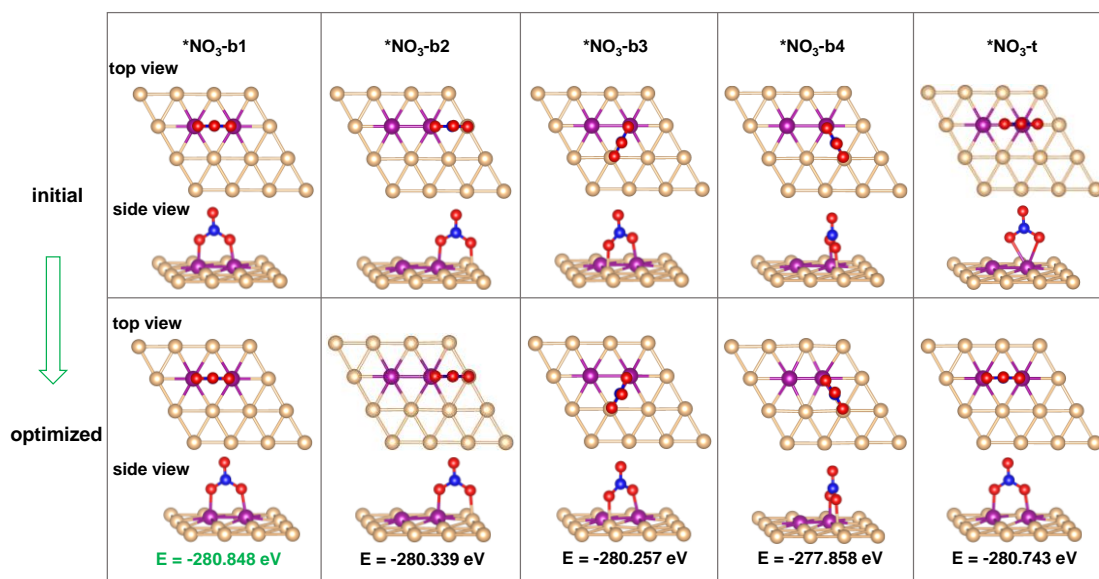

**Fig. S5.** The initial and optimized structures of several possible NO<sub>3</sub><sup>-</sup> adsorption on Mn<sub>2</sub>Cu catalyst.

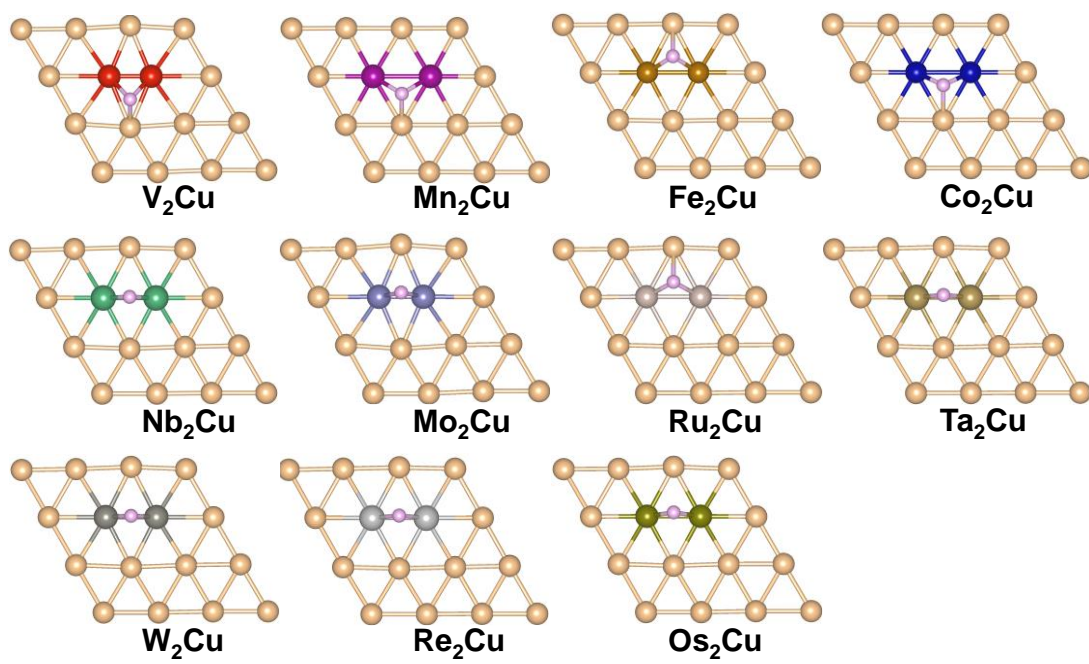

**Fig. S6.** The most stable adsorption configurations of H atoms on screened TM<sub>2</sub>Cu catalysts.

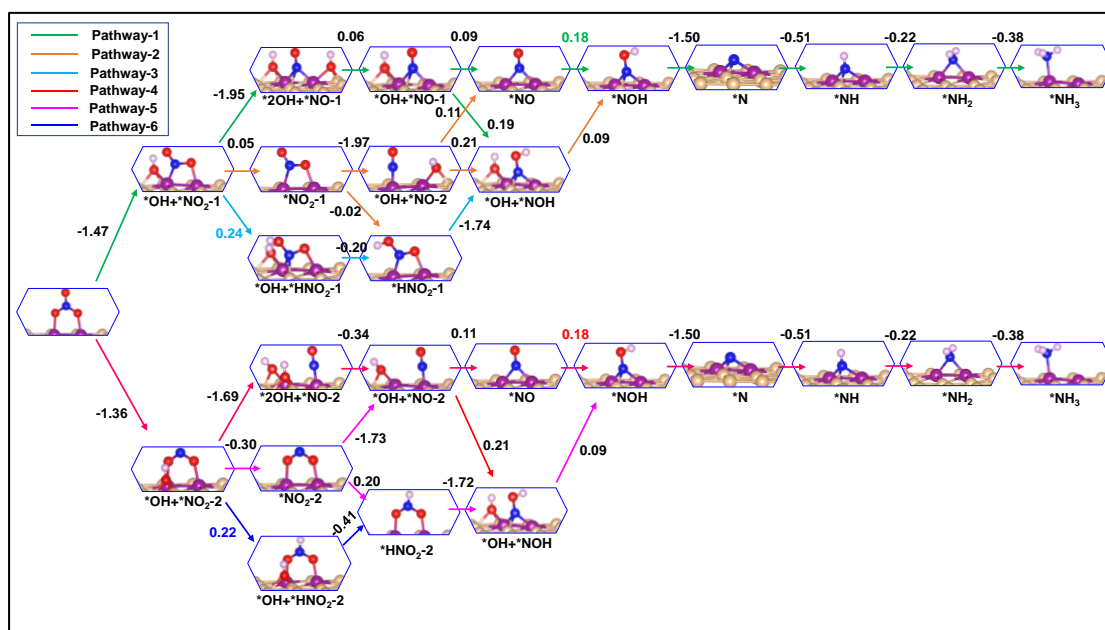

**Fig. S7.** The all possible reaction pathway on Mn<sub>2</sub>Cu catalyst, which contain the optimized reaction intermediate structures and free energy changes in each elementary step. The green pathway contains the most stable configurations of the overall reaction, while the other color pathways along relatively unstable structures.

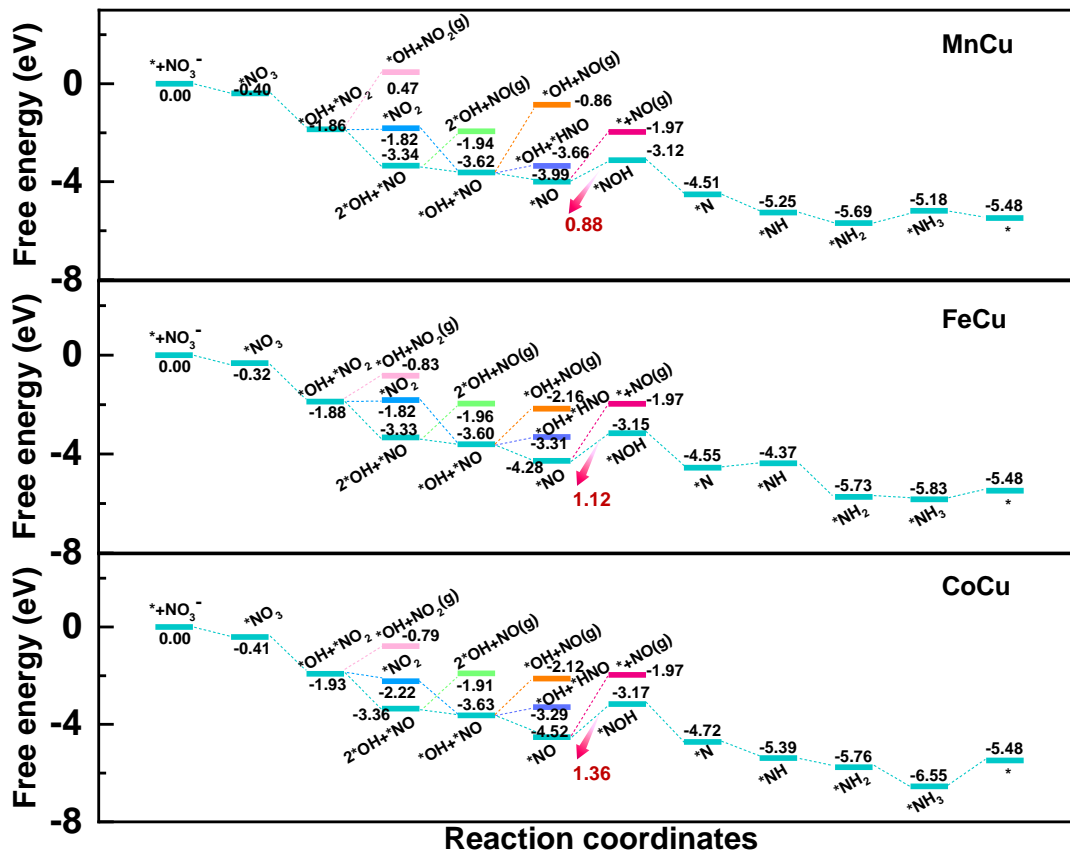

Fig. S8. Free energy diagram and the configurations of corresponding intermediates for the eNO<sub>3</sub>RR on MnCu, FeCu, and CoCu SAA catalysts.

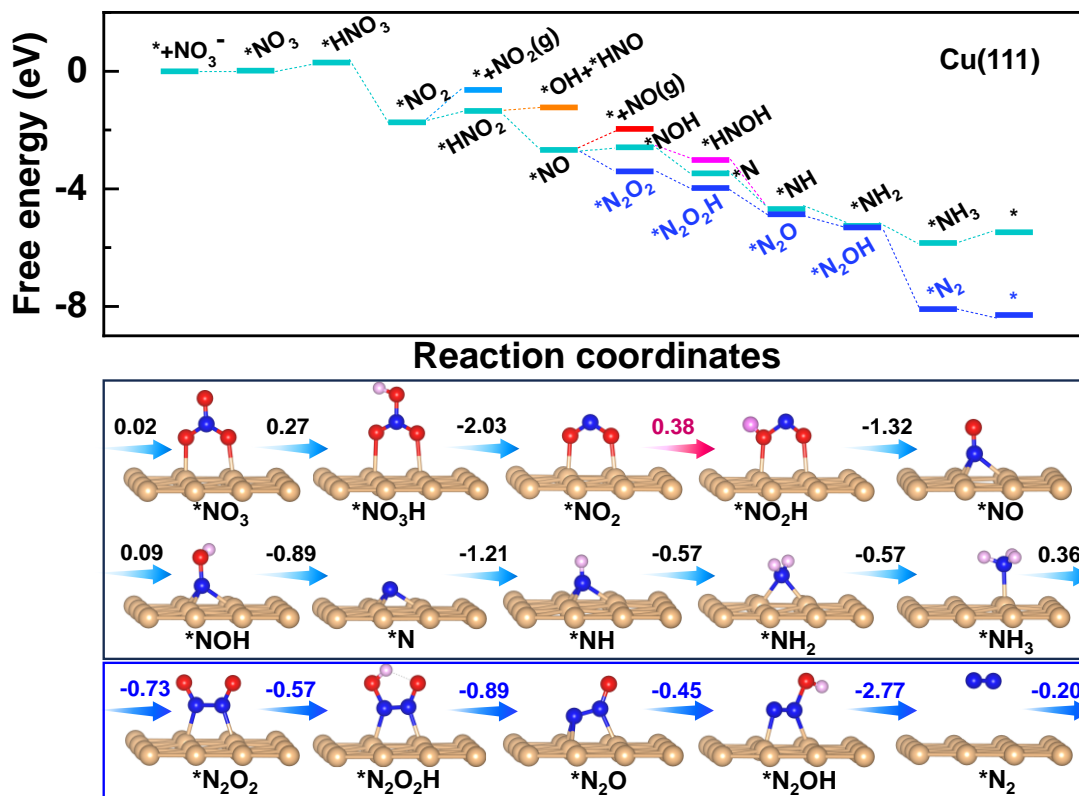

Fig. S9. Free energy diagram and the configurations of corresponding intermediates for the eNO<sub>3</sub>RR on pristine Cu(111).



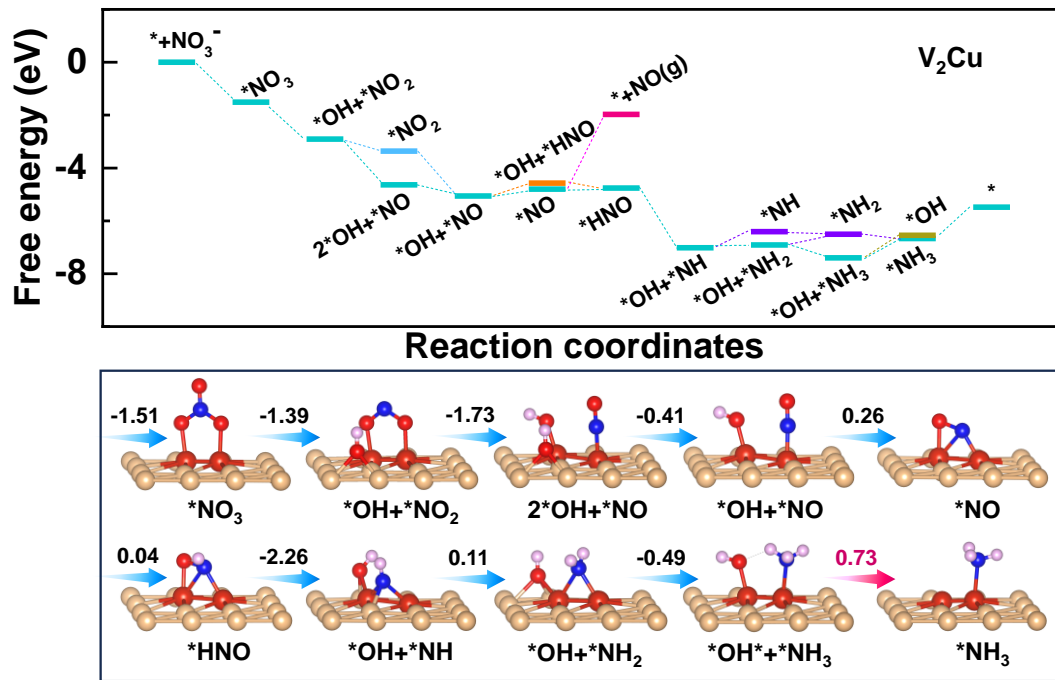

**Fig. S10.** Free energy diagram and the configurations of corresponding intermediates for the  $eNO_3RR$  on  $V_2Cu$ .

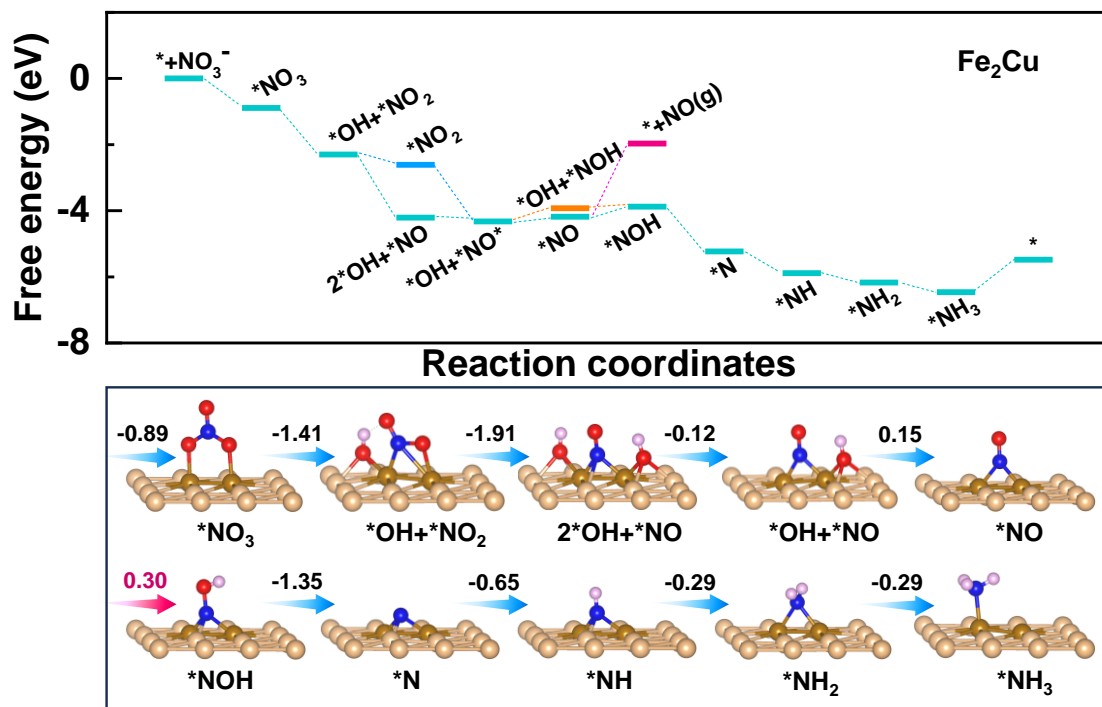

**Fig. S11.** Free energy diagram and the configurations of corresponding intermediates for the  $\text{eNO}_3\text{RR}$  on  $\text{Fe}_2\text{Cu}$ .

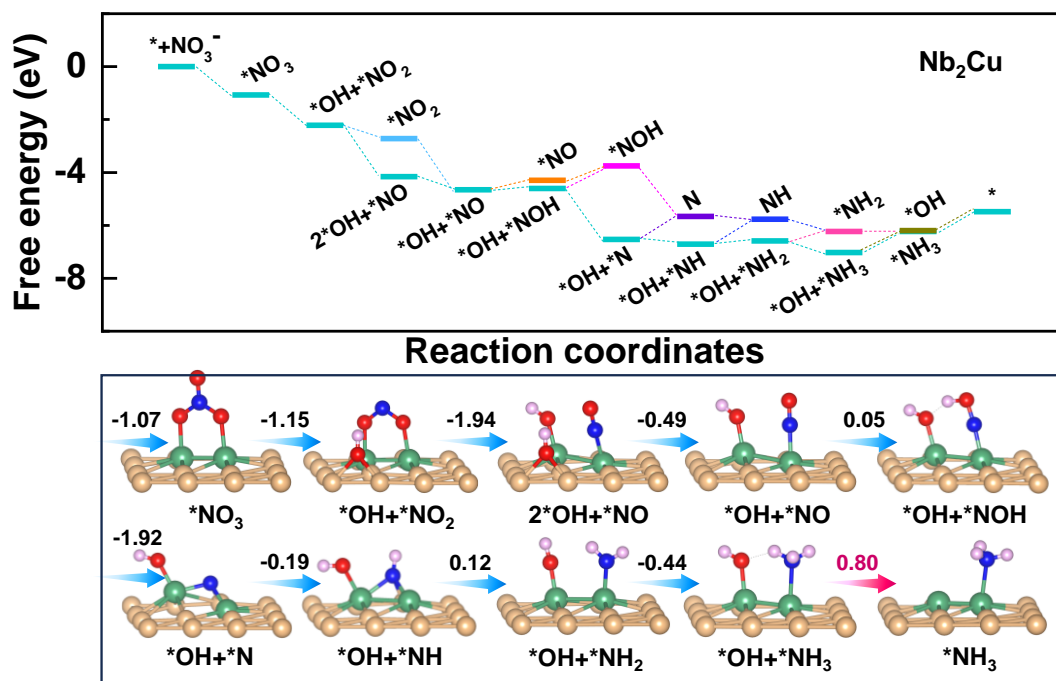

**Fig. S12.** Free energy diagram and the configurations of corresponding intermediates for the eNO<sub>3</sub>RR on Nb<sub>2</sub>Cu.

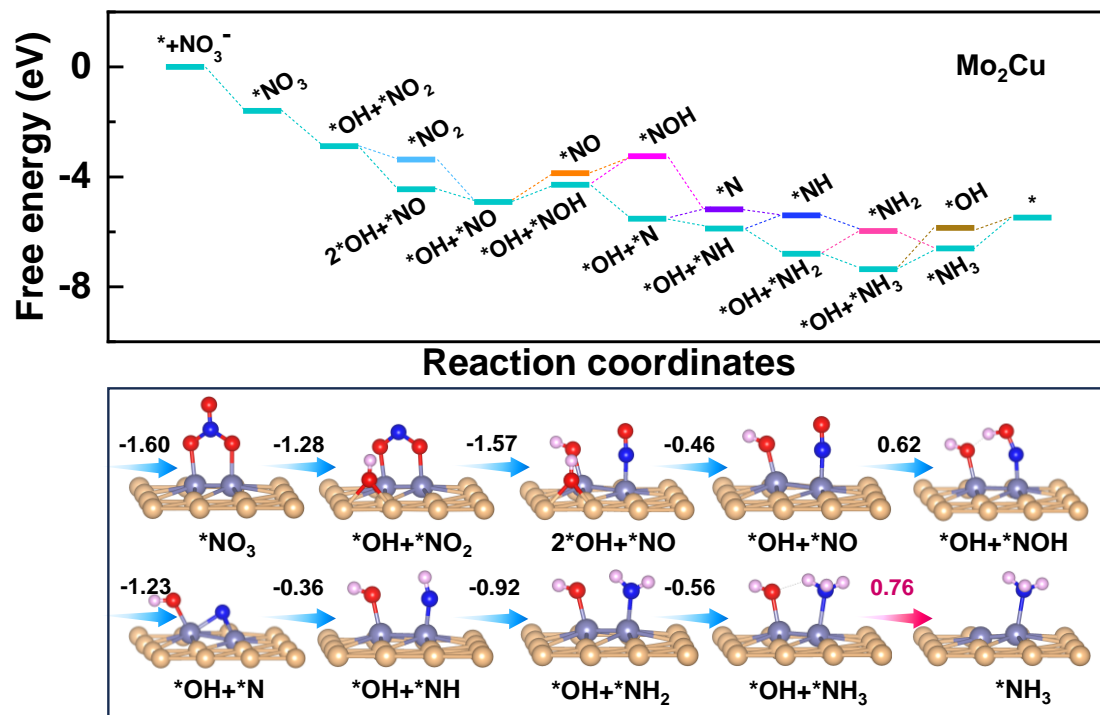

**Fig. S13.** Free energy diagram and the configurations of corresponding intermediates for the eNO<sub>3</sub>RR on Mo<sub>2</sub>Cu.

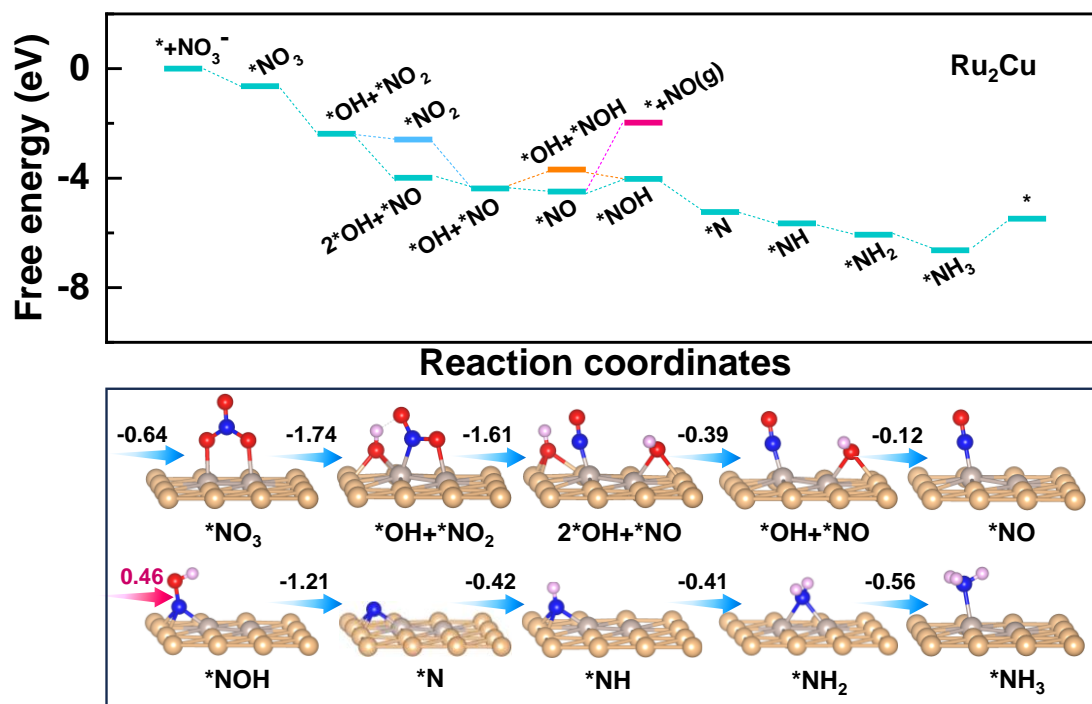

**Fig. S14.** Free energy diagram and the configurations of corresponding intermediates for the eNO<sub>3</sub>RR on Ru<sub>2</sub>Cu.

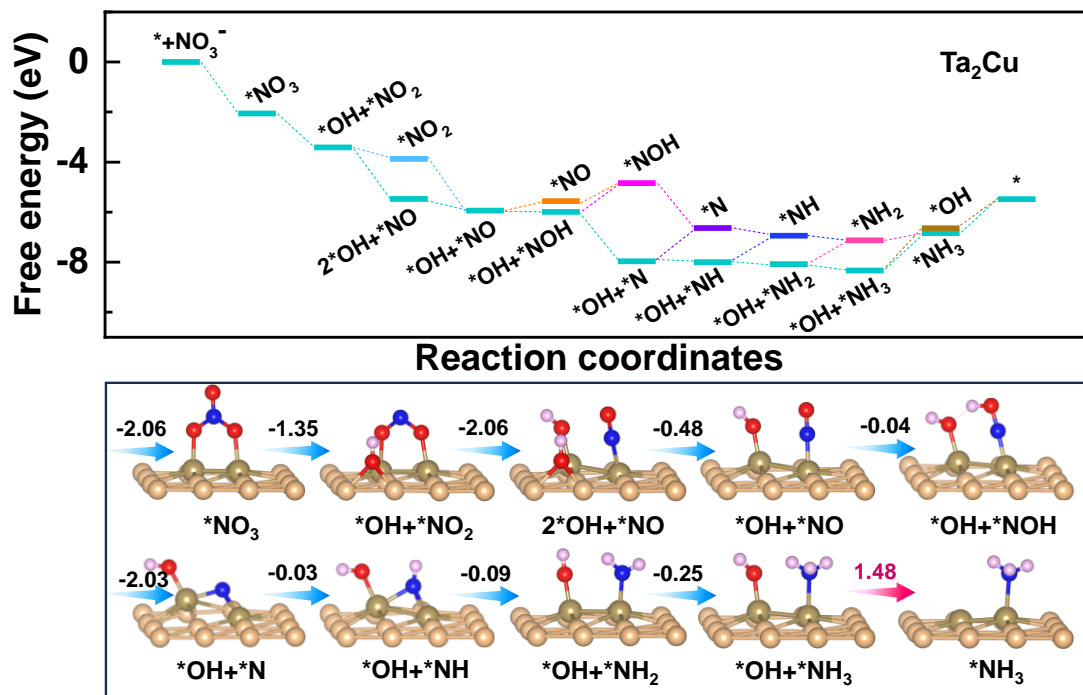

**Fig. S15.** Free energy diagram and the configurations of corresponding intermediates for the eNO<sub>3</sub>RR on Ta<sub>2</sub>Cu.

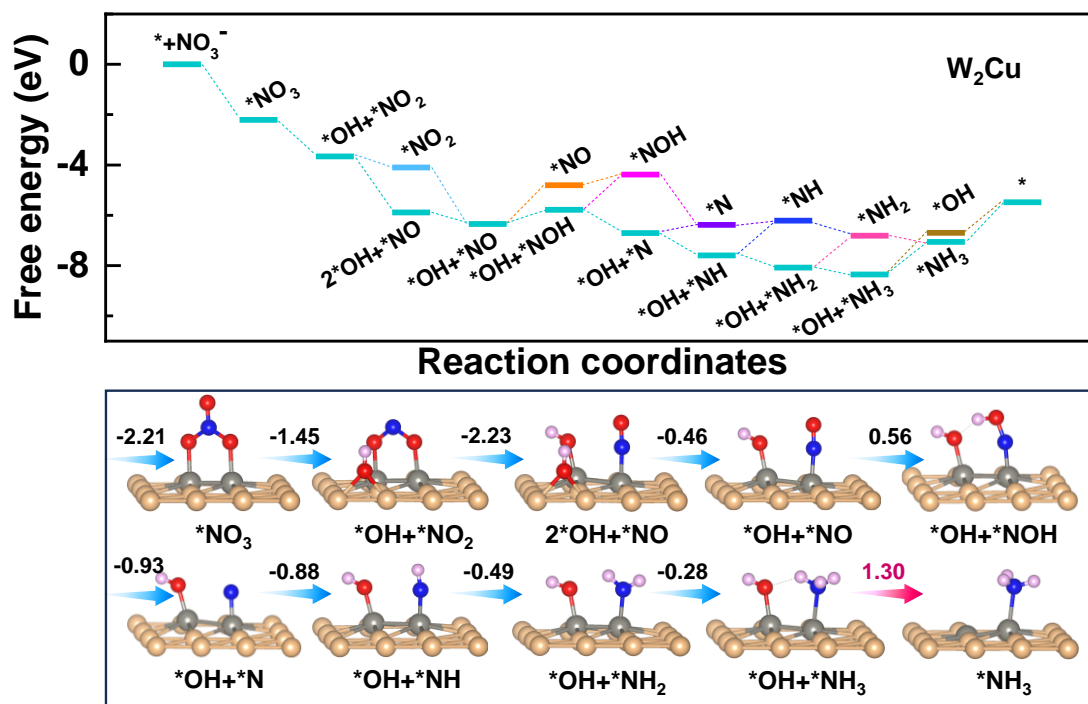

**Fig. S16.** Free energy diagram and the configurations of corresponding intermediates for the eNO<sub>3</sub>RR on W<sub>2</sub>Cu.

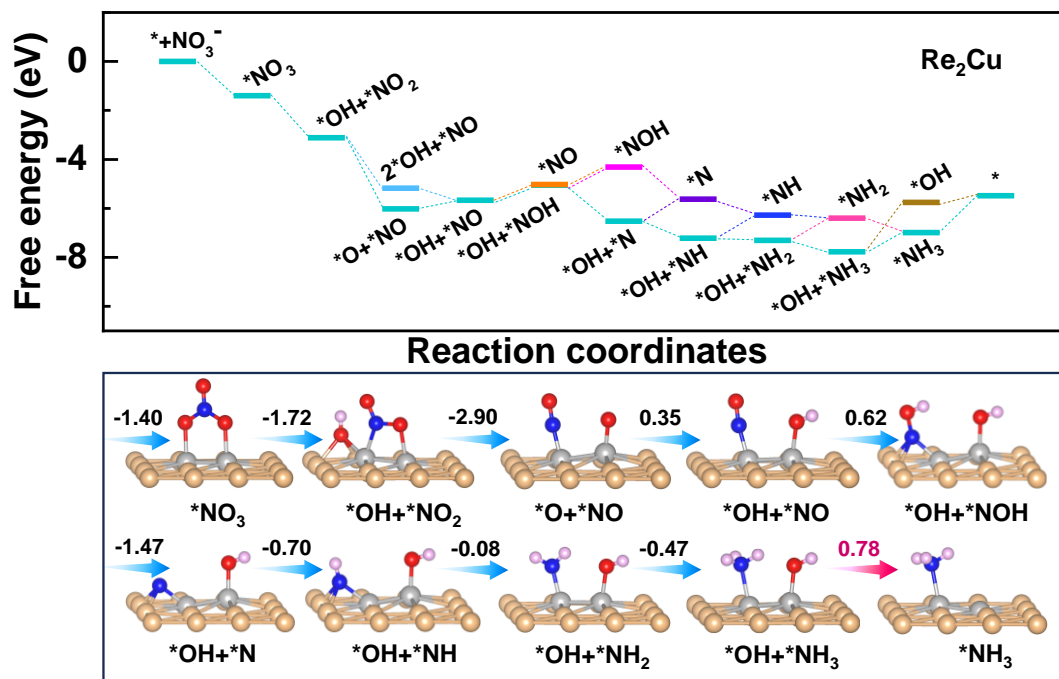

**Fig. S17.** Free energy diagram and the configurations of corresponding intermediates for the eNO<sub>3</sub>RR on Re<sub>2</sub>Cu.



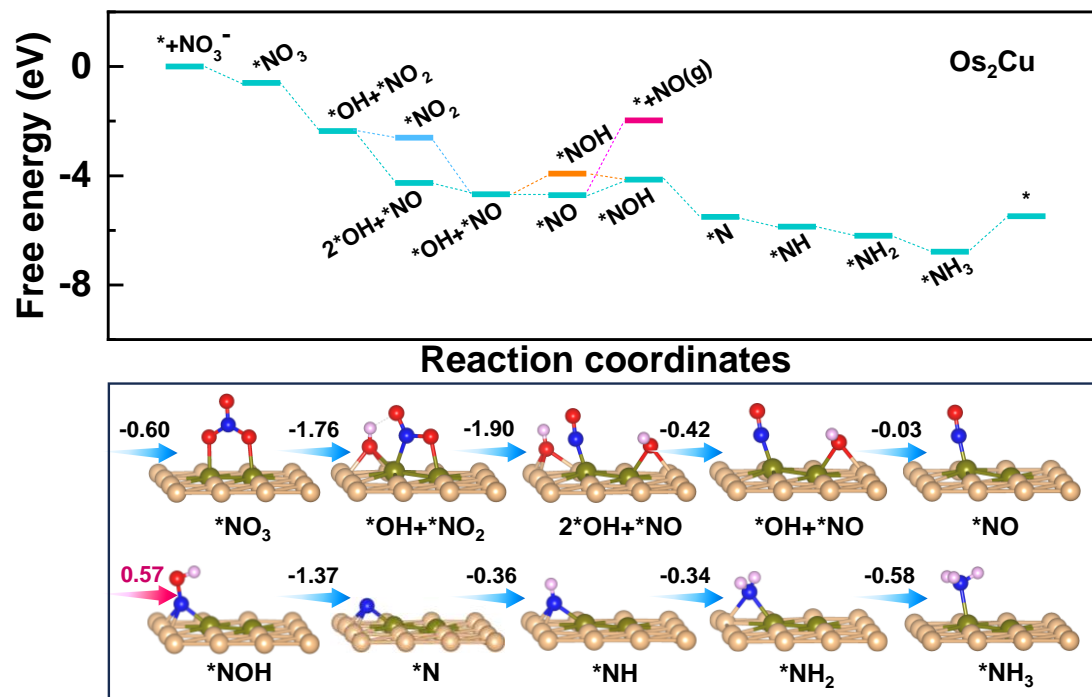

**Fig. S18.** Free energy diagram and the configurations of corresponding intermediates for the eNO<sub>3</sub>RR on Os<sub>2</sub>Cu.

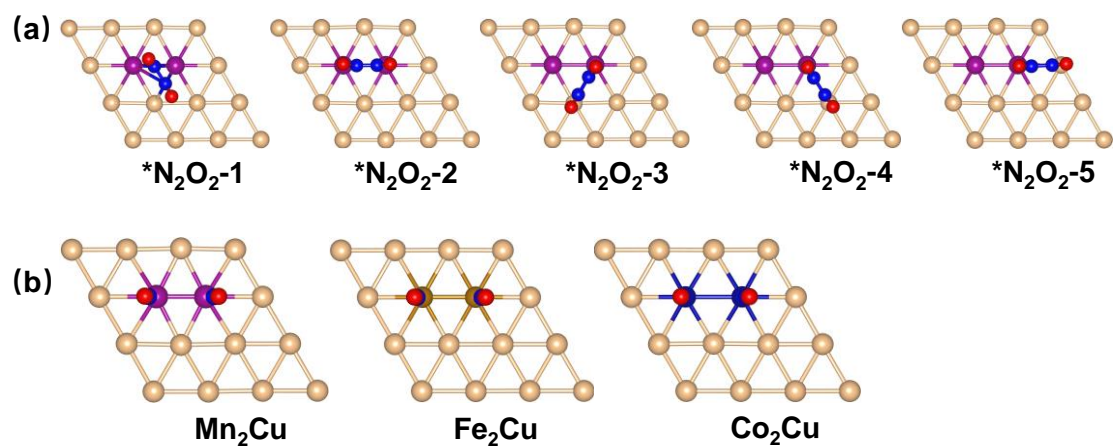

**Fig. S19.** (a) The considered adsorption sites and initial configurations of  $^*N_2O_2$  on  $TM_2Cu$ .

(b) The most stable adsorption configuration of  $^*N_2O_2$  on  $Mn_2Cu$ ,  $Fe_2Cu$  and  $Co_2Cu$ .

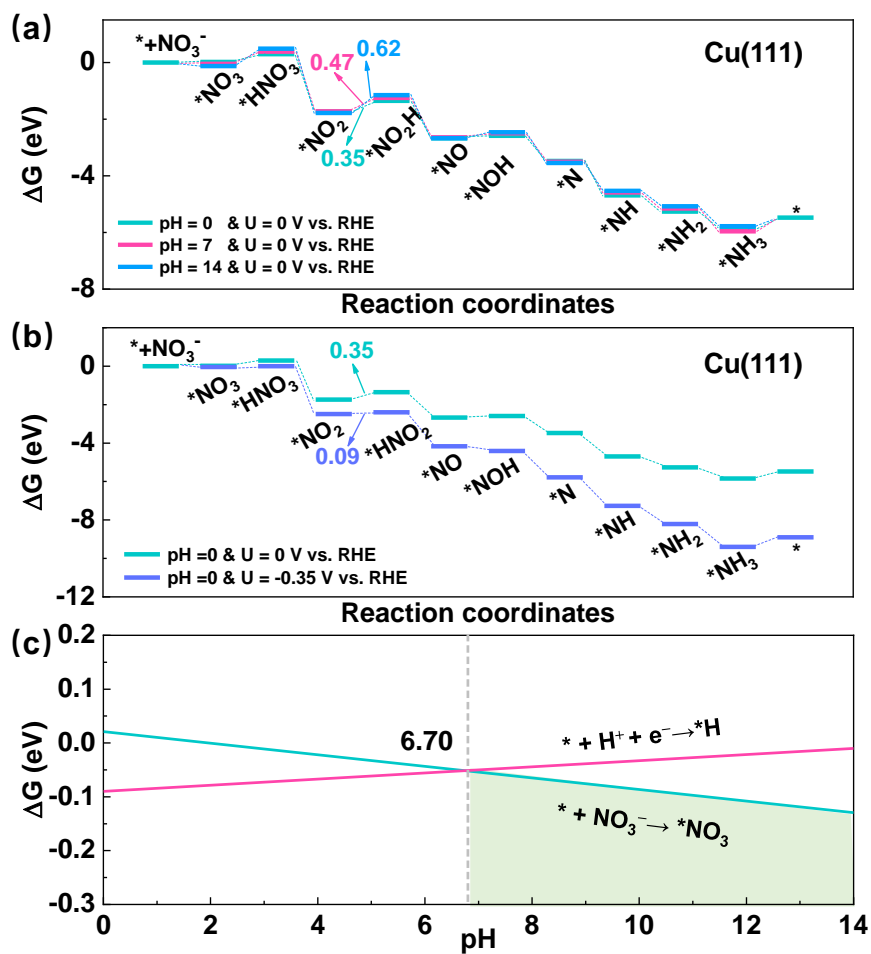

**Fig. S20.** (a) eNO<sub>3</sub>RR free energy diagram along the optimal reaction path at different pH conditions for Cu(111). (b) eNO<sub>3</sub>RR free energy diagram along the optimal reaction path at applied potentials for Cu(111). (c) The competitive relationship of  $\Delta G(*NO_3)$  and  $\Delta G(*H)$  between eNO<sub>3</sub>RR and HER in all pH region on Cu(111).

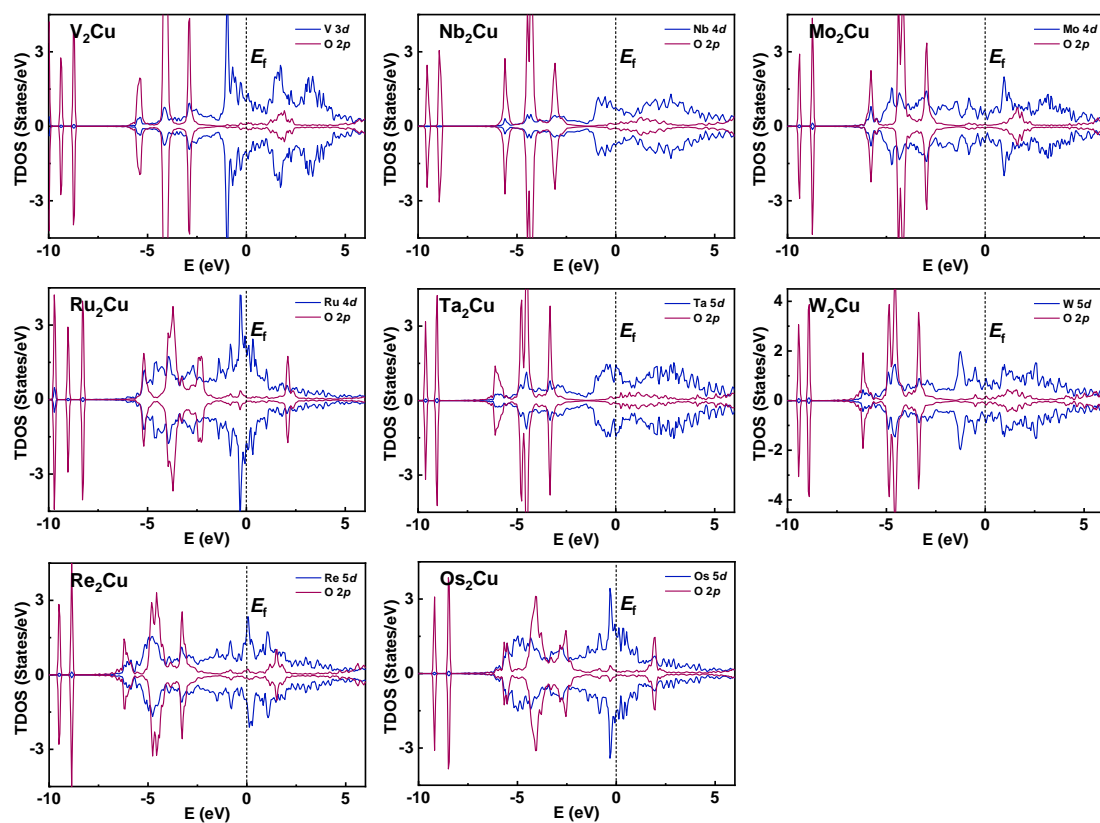

**Fig. S21.** Projected densities of states (PDOS) of the TM and O (in  $^*NO_3$ )  $2p$  states, which is bonded with the TM atom. The vertical dashed line denotes the position of Fermi level ( $E_f$ ).

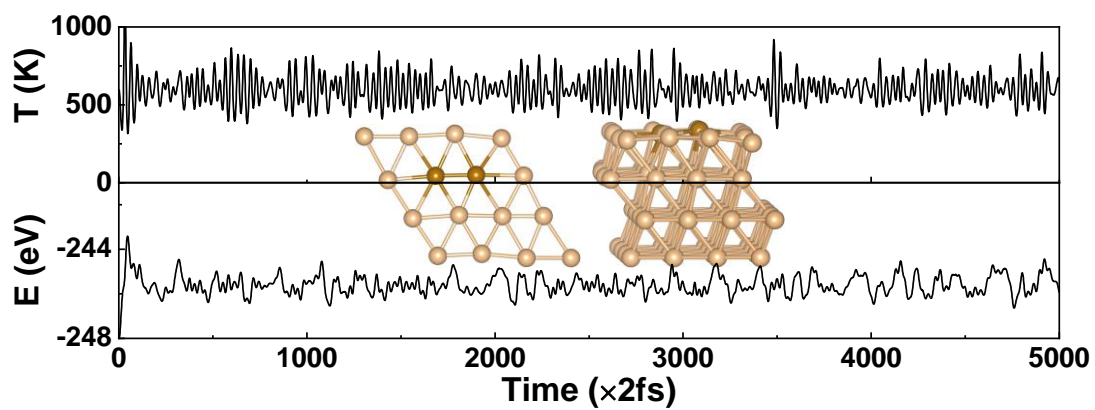

**Fig. S22.** The changes of temperature and energy during the AIMD simulation lasting 20 ps for  $\text{Fe}_2\text{Cu}$ , the top and side view of final configurations for the AIMD simulation are displayed.
